# Supplementary material for: Structural complexity of the magnesiation of furan: an octadecanuclear product with a subporphyrin-like Mg3(2,5-fur-di-yl)3 substructure
Source: Royal Society of Chemistry journal article supplement (doi:10.1039/b812147h), 2008-01-01
Supplement: b812147h.pdf [file b812147h.pdf]

## **Structural complexity of the magnesiumation of furan: an octadecanuclear product with a subporphyrin-like $\text{Mg}_3(2,5\text{-fur-di-yl})_3$ substructure**

**Victoria L. Blair, Alan R. Kennedy, Jan Klett\* and Robert E. Mulvey\***

*WestCHEM, Department of Pure and Applied Chemistry, University of Strathclyde, Glasgow, UK G1 1XL. E-mail: [r.e.mulvey@strath.ac.uk](mailto:r.e.mulvey@strath.ac.uk)*

### **Supplementary Information**

#### **General Methods**

*n*-Hexane and furan was distilled from sodium/benzophenone. All synthetic work was carried out under an inert argon atmosphere using standard Schlenk techniques.  $\text{Mg}(\text{CH}_2\text{SiMe}_3)_2$  was prepared from the Grignard reagent  $(\text{Me}_3\text{SiCH}_2)\text{MgCl}$  by manipulation of the Schlenk equilibrium via the dioxane precipitation method. The resultant off white solid was purified via sublimation at  $175^\circ\text{C}$  ( $10^{-2}$  torr) to furnish pure  $\text{Mg}(\text{CH}_2\text{SiMe}_3)_2$ . Elemental analyses were attempted using a Perkin Elmer 2400 elemental analyzer however, due to the extreme air-sensitivity of of compounds **3** and **4** satisfactory analyses could not be obtained.

#### **Synthesis of $[(\text{TMEDA})\cdot\text{Na}(\text{CH}_2\text{SiMe}_3)(\text{TMP})\text{Mg}(\text{TMP})] \mathbf{3}$**

TMPH (0.36mL, 2mmol) was added to a suspension of BuNa (0.08g, 1mmol) in dry *n*-hexane (20mL) and the resultant mixture was allowed to stir at room temperature for 1 h.  $\text{Mg}(\text{CH}_2\text{SiMe}_3)_2$  (0.2g, 1mmol) and TMEDA (0.15mL, 1mmol) was added to give a light yellow/orange solution and the resultant solution was allowed to stir for 12 hrs at room temperature. The reaction mixture was filtered and subsequent removal of the solvent *in vacuo* gave a crop of large colourless crystals (0.1g, 19%).

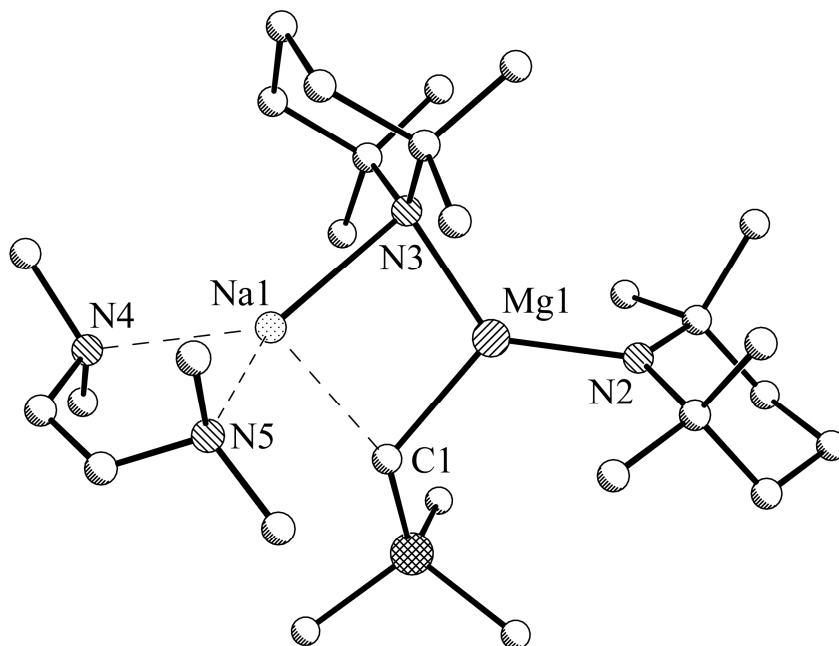

Figure 1 Crystal structure of [(TMEDA).Na(CH<sub>2</sub>SiMe<sub>3</sub>)(TMP)Mg(TMP)] **3**

### Crystallographic Data

Table 1: Selected bond lengths and bond angles of Compound **3**

| Selected Bond lengths Å |            | Selected Bond Angles ° |            |
|-------------------------|------------|------------------------|------------|
| Mg1-C1                  | 2.179(2)   | <b>N3-Mg1-N2</b>       | 128.70(14) |
| Mg1-N2                  | 1.9895(18) | <b>N3-Mg1-C1</b>       | 106.67(13) |
| Mg1-N3                  | 2.068(3)   | <b>N2-Mg1-C1</b>       | 123.36(10) |
| Na1-N3                  | 2.454(4)   | <b>N3-Na1-C1</b>       | 83.08(9)   |
| Na1-C1                  | 2.678(2)   | <b>N3-Na1-N5</b>       | 138.90(13) |
| Na1-N4                  | 2.433(2)   | <b>N3-Na1-N4</b>       | 139.70(12) |
| Na1-N5                  | 2.488(3)   | <b>C1-Na1-N5</b>       | 100.81(12) |
|                         |            | <b>C1-Na1-N4</b>       | 115.48(10) |
|                         |            | <b>N5-Na1-N4</b>       | 75.48(12)  |

Data for **3** were measured on a Nonius Kappa CCD instrument and for **4** on an Oxford Diffraction Xcalibur S. Both datasets were measured at 123K with graphite monochromated Mo $K\alpha$  radiation ( $\lambda = 0.71073 \text{ \AA}$ ). All non-H atoms were refined anisotropically – except where disorder precluded this. Brief details are given below – with full data available in cif format.

Crystal data for **3**: C<sub>28</sub>H<sub>63</sub>Mg<sub>1</sub>N<sub>4</sub>Na<sub>1</sub>Si<sub>1</sub>,  $M_r = 531.21$ , orthorhombic, space group Pna2<sub>1</sub>,  $a = 14.8470(2)$ ,  $b = 19.3771(3)$ ,  $c = 12.0280(4) \text{ \AA}$ ,  $V = 3460.34(14) \text{ \AA}^3$ ,  $Z = 4$ ,  $\lambda = 0.71073 \text{ \AA}$ ,  $\mu = 0.119 \text{ mm}^{-1}$ ,  $T = 123 \text{ K}$ ; 7665 reflections; final refinement to convergence on  $F^2$  gave  $R = 0.0495$  ( $F$ , 6037 obs. data only) and  $R_w = 0.1210$  ( $F^2$ , all data), GOF = 1.048. The bridging TMP ligand was modeled as disordered over two sites using SADI and SAME restraints. Refined occupancy 0.85(5):0.15(5).

Crystal data for **4**: C<sub>108</sub>H<sub>160</sub>Mg<sub>6</sub>N<sub>12</sub>Na<sub>12</sub>O<sub>16</sub>Si<sub>2</sub>,  $M_r = 2360.40$ , triclinic, space group P  $\bar{1}$ ,  $a = 15.5127(6)$ ,  $b = 16.7993(7)$ ,  $c = 17.7608(8) \text{ \AA}$ ,  $\alpha = 61.930(5)$ ,  $\beta = 73.749(4)$ ,  $\gamma = 63.757(4)^\circ$ ,  $V = 3648.0(3) \text{ \AA}^3$ ,  $Z = 1$ ,  $\lambda = 0.71073 \text{ \AA}$ ,  $\mu = 0.140 \text{ mm}^{-1}$ ,  $T = 123 \text{ K}$ ; 21042 reflections, 12205 unique,  $R_{\text{int}} 0.0234$ ; final refinement to convergence on  $F^2$  gave  $R = 0.0565$  ( $F$ , 7447 obs. data only) and  $R_w = 0.1662$  ( $F^2$ , all data), GOF = 0.969. One TMEDA, two furans and a Na atom are modeled as disordered, each over two sites with site occupancies set to 0.5. The program SQUEEZE was implemented in PLATON to remove the equivalent of 8 electrons from solvent accessible voids totaling  $561 \text{ \AA}^3$ . The chemical identity of this “solvent” was not apparent.

**<sup>1</sup>H NMR (400MHz, d<sub>6</sub>-benzene, 300K):** δ 1.95 (q, 4H, γ-CH<sub>2</sub>, TMP) 1.70 (12H, CH<sub>3</sub>, TMEDA), 1.60 (s, 4H, CH<sub>2</sub>, TMEDA), 1.52 (s, 24H, CH<sub>3</sub> TMP), 1.44 (s (br), β-CH<sub>2</sub>, TMP), 0.48 (s, 12H, CH<sub>3</sub> CH<sub>2</sub>SiMe<sub>3</sub>), -2.00 (s, 2H, CH<sub>2</sub>, CH<sub>2</sub>SiMe<sub>3</sub>).

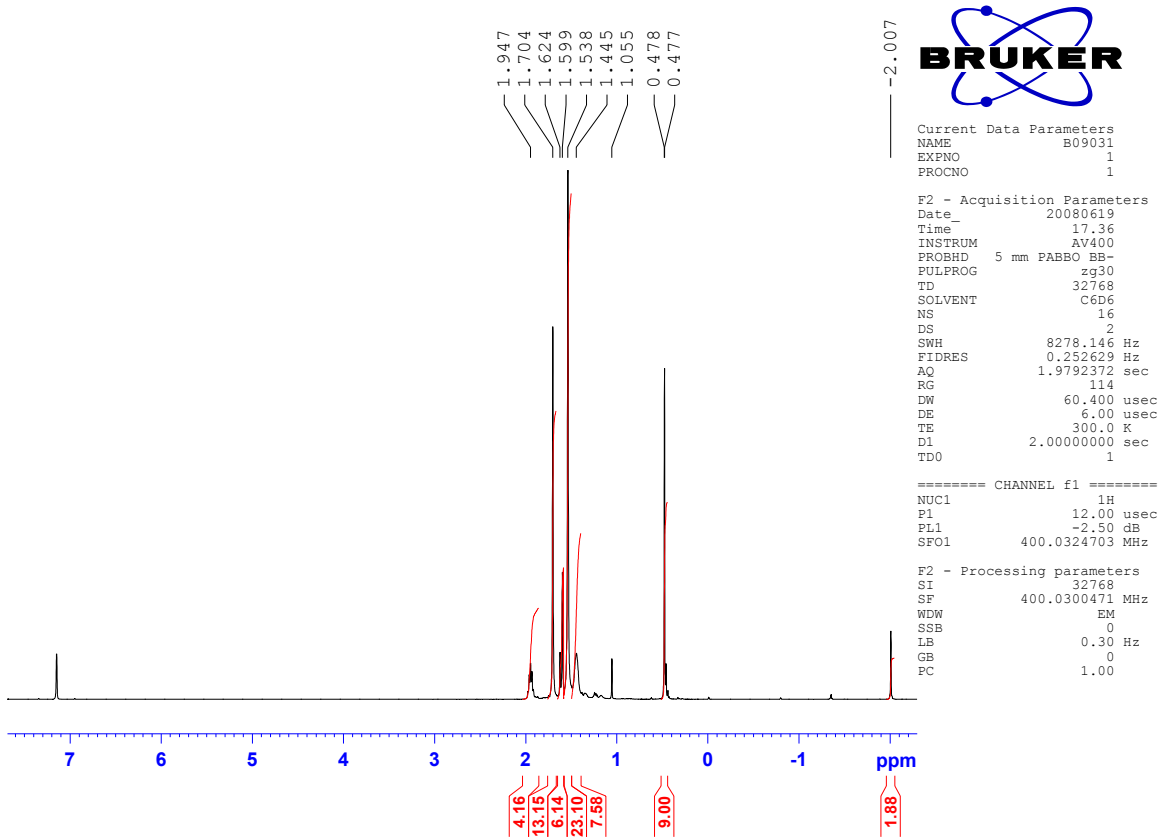

<sup>1</sup>H NMR spectrum (400MHz, d<sub>6</sub>-benzene, 300K) Compound 3

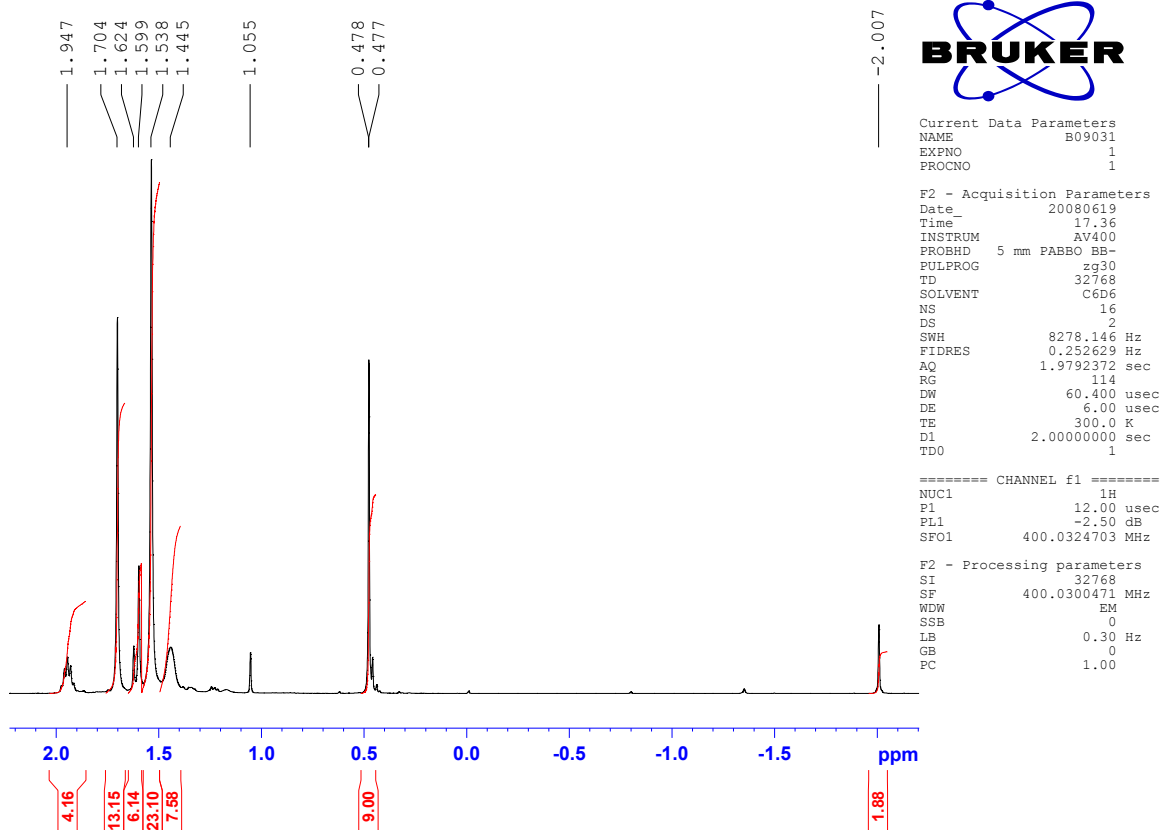

<sup>1</sup>H NMR-spectrum, aliphatic region (400MHz, d<sub>6</sub>-benzene, 300K) Compound 3

$^1\text{H}$  NMR (400MHz,  $d_{12}$ -cyclohexane, 300K):  $\delta$ 2.31 (s, 4H,  $\text{CH}_2$ , TMEDA), 2.21 (s, 12H,  $\text{CH}_3$ , TMEDA), 1.66 (q, 4H,  $\gamma\text{-CH}_2$ , TMP), 1.20 (s (br), 32H, overlapping  $\text{CH}_3$  and  $\beta\text{-CH}_2$ , TMP), -0.03 (s, 12H,  $\text{CH}_3$ ,  $\text{CH}_2\text{SiMe}_3$ ), -2.24 (s, 2H,  $\text{CH}_2$ ,  $\text{CH}_2\text{SiMe}_3$ ).

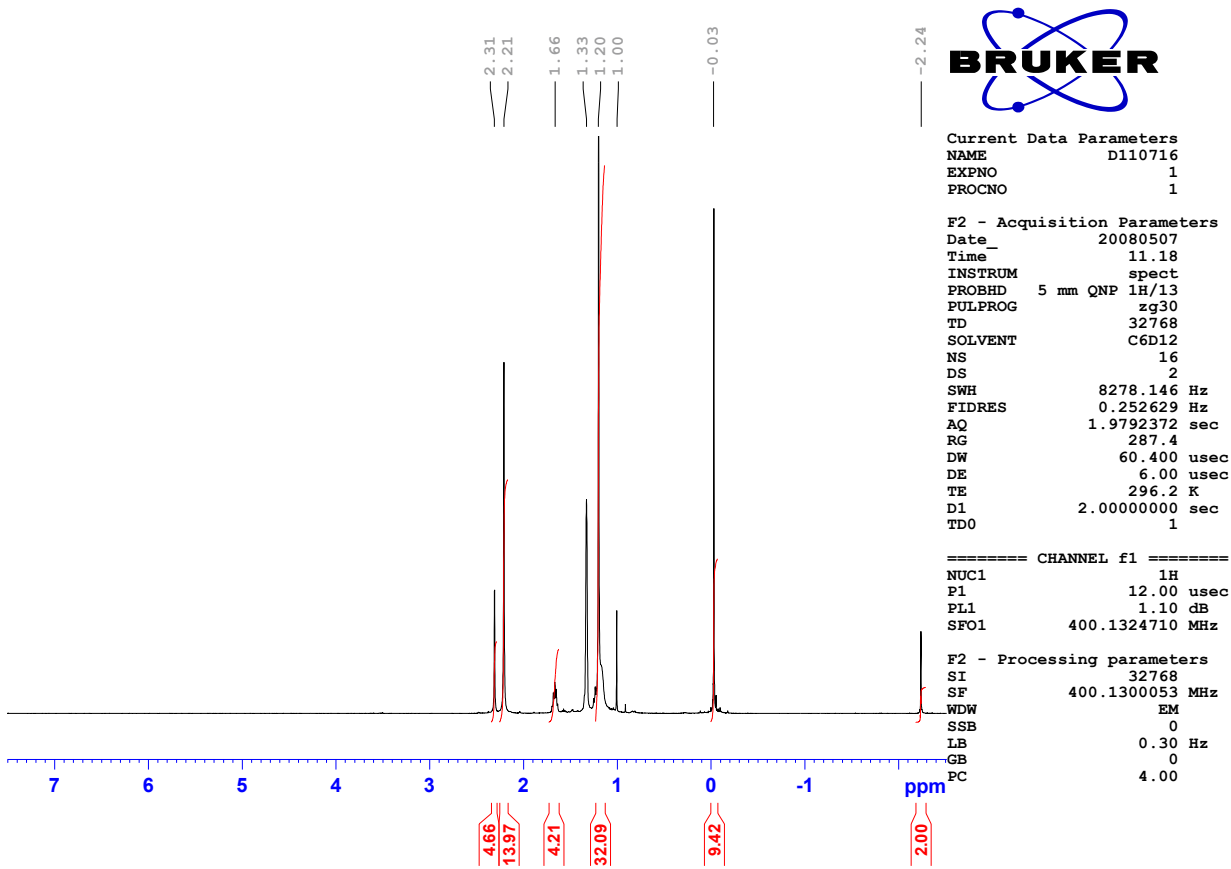

$^1\text{H}$  NMR spectrum (400MHz,  $d_{12}$ -cyclohexane, 300K) Compound 3

### Synthesis of $[\{(\text{TMEDA})_3\text{Na}_6\text{Mg}_3(\text{CH}_2\text{SiMe}_3)(2,5\text{-C}_4\text{H}_2\text{O})_3(2\text{-C}_4\text{H}_3\text{O})_5\}_3]4$

TMPH (0.36mL, 2mmol) was added to a suspension of BuNa (0.08g, 1mmol) in dry n-hexane (20mL) and the resultant mixture was allowed to stir at room temperature for 1h.  $\text{Mg}(\text{CH}_2\text{SiMe}_3)_2$  (0.2g, 1mmol), TMEDA (0.15mL, 1mmol) and furan (0.07mL, 1mmol) was added. The resultant cloudy solution was gently heated for 5 mins and allowed to cool to room temperature depositing a crop of large colourless crystals (0.07g, 48%).

On repeating the reaction but allowing the solution to stir at room temperature for 12hrs, a white solid can be isolated as the title compound in a higher yield (0.11g, 75%).

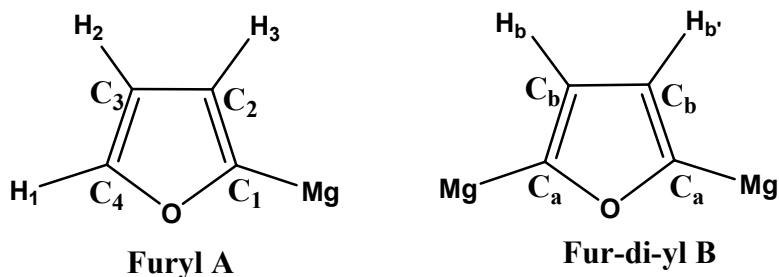

Figure 2: Numbering scheme for Compound **4** used in the  $^1\text{H}$  and  $^{13}\text{C}$  NMR interpretation.

**$^1\text{H}$  NMR spectrum (500MHz,  $d_8$ -THF, 300K):**  $\delta$ 7.61 (s (br), 10H, H<sub>3</sub>, furyl A), 6.37 (t, 10H, H<sub>2</sub> furyl A), 6.29 (s, 12H H<sub>b+b'</sub>, furyl B), 6.12 (s (br), 10H, H<sub>1</sub> furyl A), 2.30 (s, 24H, CH<sub>2</sub>, TMEDA), 2.15 (s, 75H, CH<sub>3</sub>, TMEDA), -0.10 (s, 9H, CH<sub>3</sub>, CH<sub>2</sub>Si(CH<sub>3</sub>)<sub>3</sub>), -1.62 (s, 2H, CH<sub>2</sub>, CH<sub>2</sub>Si(CH<sub>3</sub>)<sub>3</sub>)

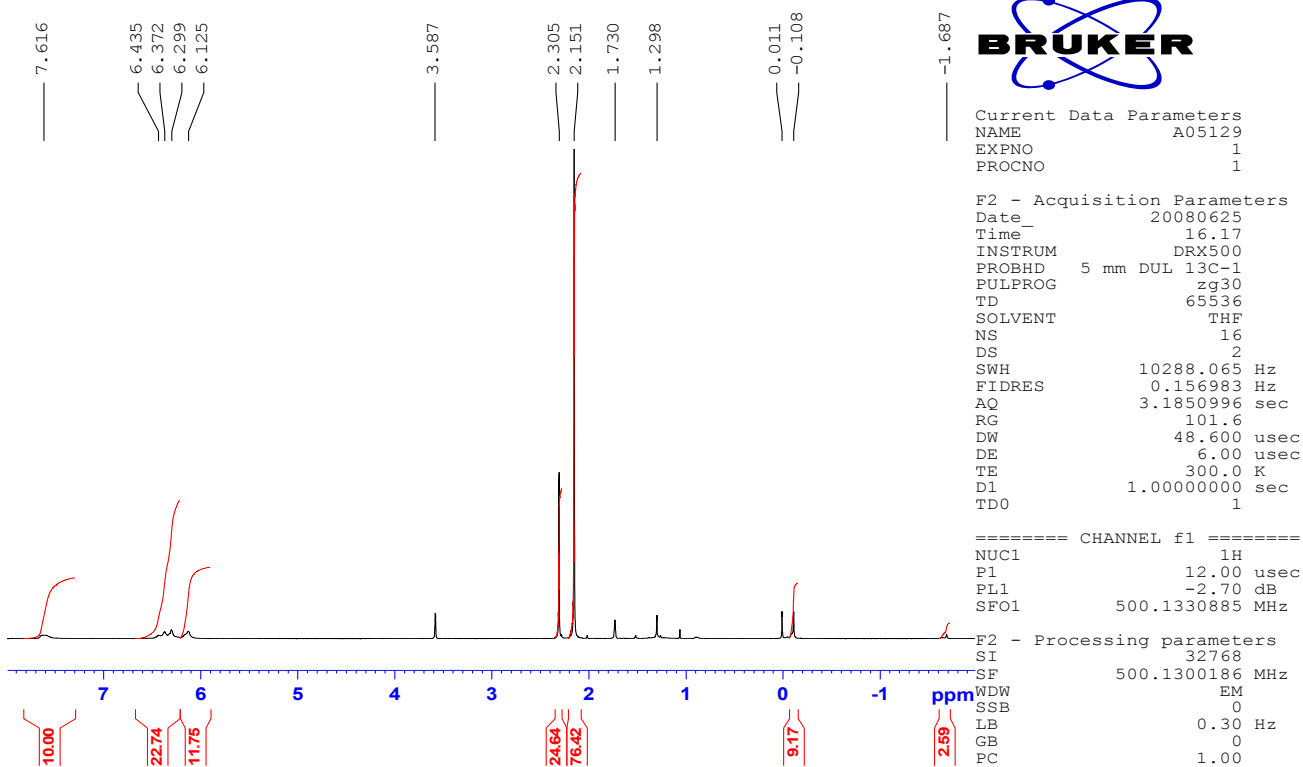

<sup>1</sup>H NMR spectrum (500MHz, d<sub>8</sub>-THF, 300K) Compound 4

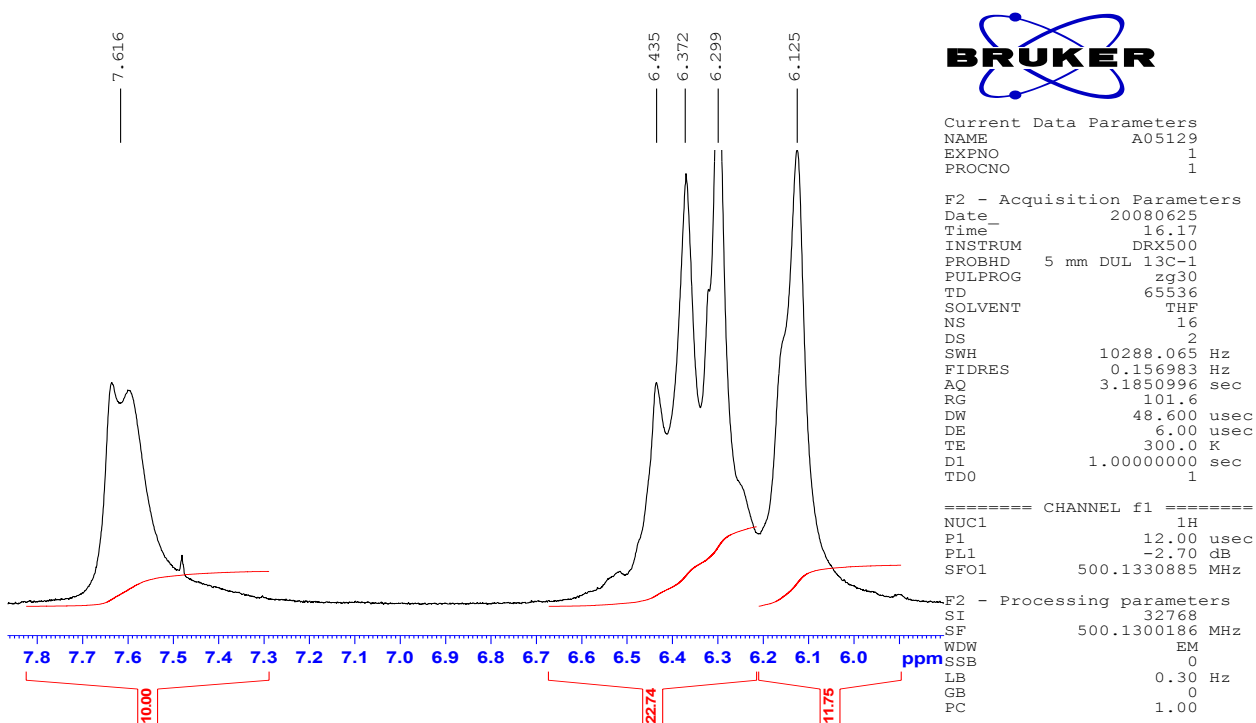

<sup>1</sup>H NMR- spectrum, aromatic region (500MHz, d<sub>8</sub>-THF, 300K) Compound 4



**$^{13}\text{C}$  NMR spectrum (500MHz,  $d_8$ -THF, 300K):** 200.7, 199.8 (C-Mg from  $\text{C}_1$ , furyl A +  $\text{C}_a$ , furyl B) 142.5 ( $\text{C}_2$ , furyl A), 120.5 ( $\text{C}_b$ , furyl B), 119.6 ( $\text{C}_4$ , furyl A), 107.2 ( $\text{C}_3$ , furyl A)  
A)

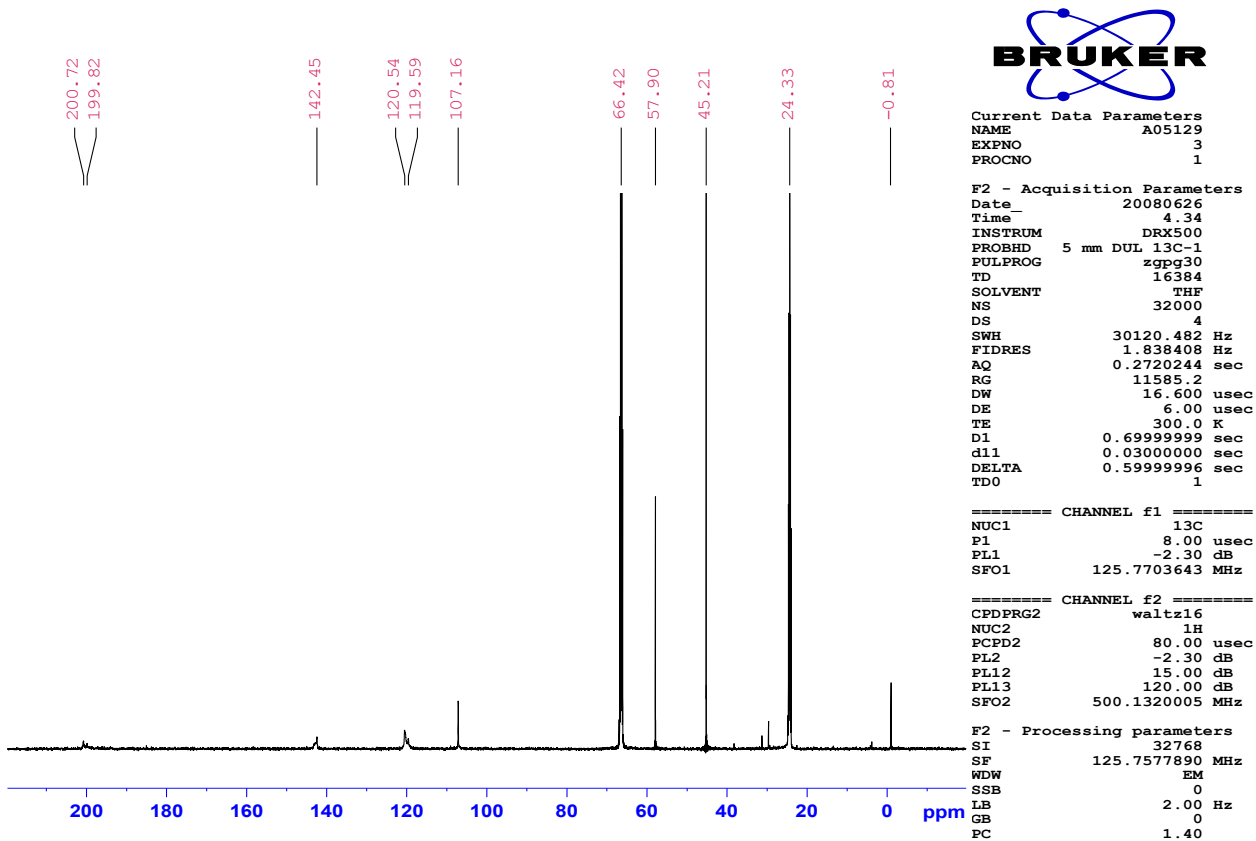

$^{13}\text{C}$  NMR (500MHz,  $d_8$ -THF, 300K) Compound 4

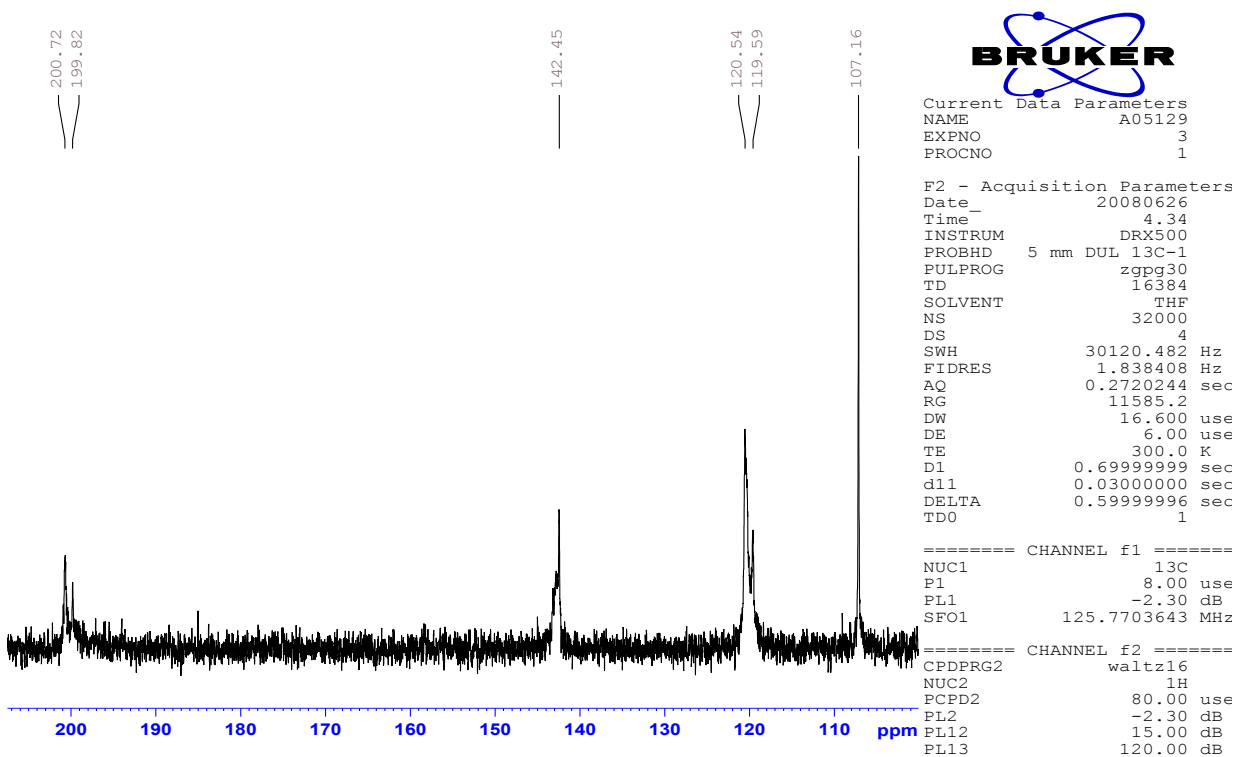

$^{13}\text{C}$  NMR spectrum, aromatic region (500MHz,  $d_8$ -THF, 300K) Compound 4

#### Deuterium Quench of Compound 4:

To a  $d_8$ -THF NMR sample of Compound 4 we added a drop of  $\text{D}_2\text{O}$  to quench the metallated furans. From this we expected to see two products Furyl A and Furyl B.

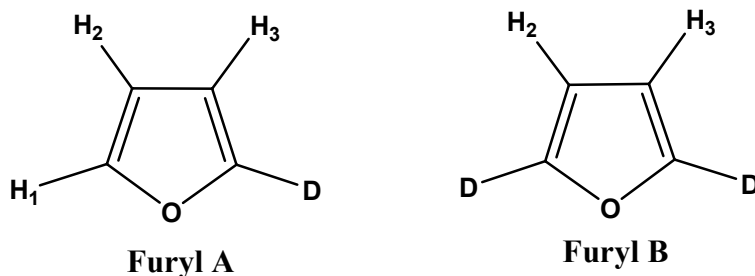

From the molecular formula of Compound 4 we would expect 10 of Furyl A and 6 of Furyl B. In both Furyls A and B the protons labelled  $\text{H}_2$  and  $\text{H}_3$  come at the same chemical shift and are thus equivalent. Furyl A would have 20 protons in total from  $\text{H}_2$  and  $\text{H}_3$ , while Furyl B would have 10 protons from  $\text{H}_2$  and  $\text{H}_3$ , giving a total of 32 protons. Furyl A also has another proton  $\text{H}_1$ , which is not present in Furyl B so would be

expected to come as a separate signal in the spectrum. The overall integrals of 32:10 equating to 3.2:1 would be expected and indeed can be seen in the spectrum below.

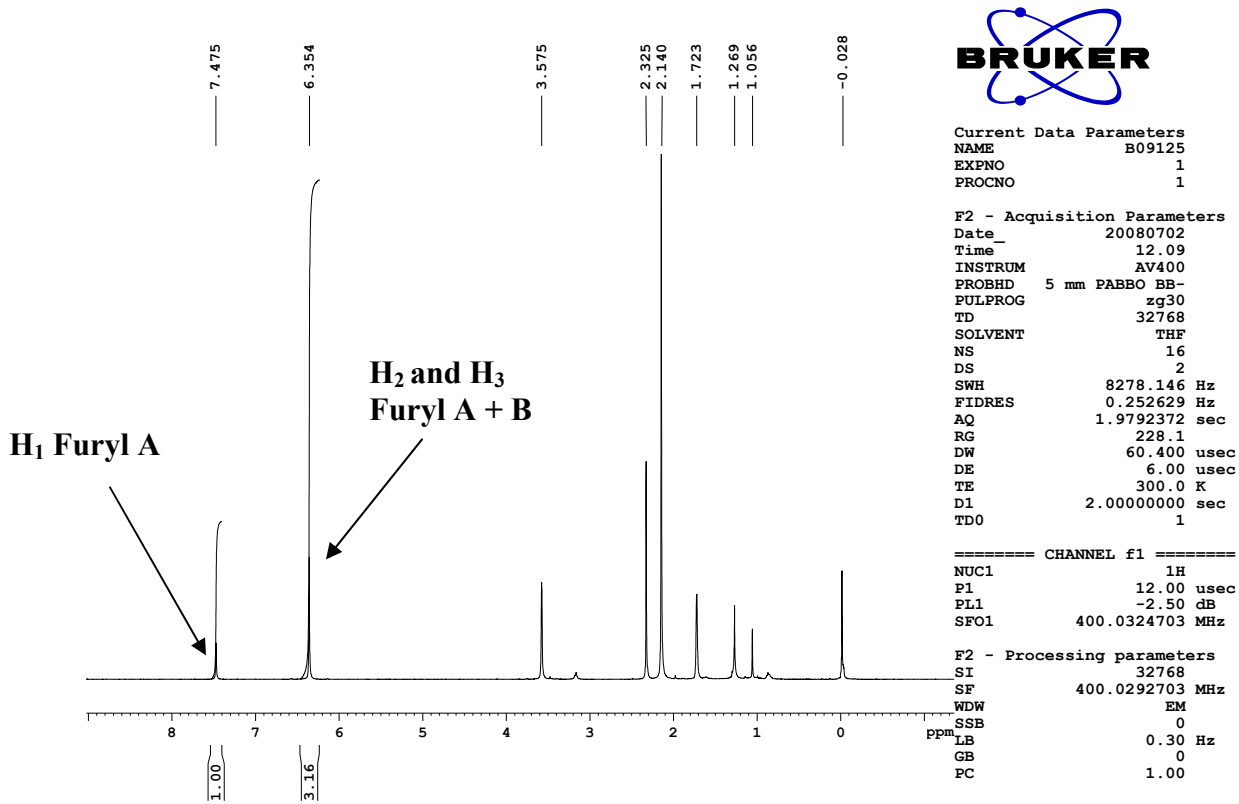

<sup>1</sup>H NMR spectrum (500MHz, d<sub>8</sub>-THF, 300K) Compound 4 + D<sub>2</sub>O
